# Supplementary material for: Remediation of hexavalent chromium and pharmaceuticals from aquatic environments by employing an oxygen-doped porous carbon adsorbent and its antifungal activity
Source: Royal Society of Chemistry journal article supplement (doi:10.1039/d2nj05841c), 2023-01-01
Supplement: d2nj05841c1.pdf [file d2nj05841c1.pdf]

**Remediation of Hexavalent Chromium, and Pharmaceuticals from aquatic environment  
employing Oxygen -doped porous carbon adsorbent; Antifungal activity**

**Sajad Ur Rehman Beig, Umar Ali Dar, Sajad Ahmad Sheergugri, Shakeel A. Shah**

*Department of Chemistry, National Institute of Technology, Srinagar Hazratbal, Srinagar, J&K  
190006, India*

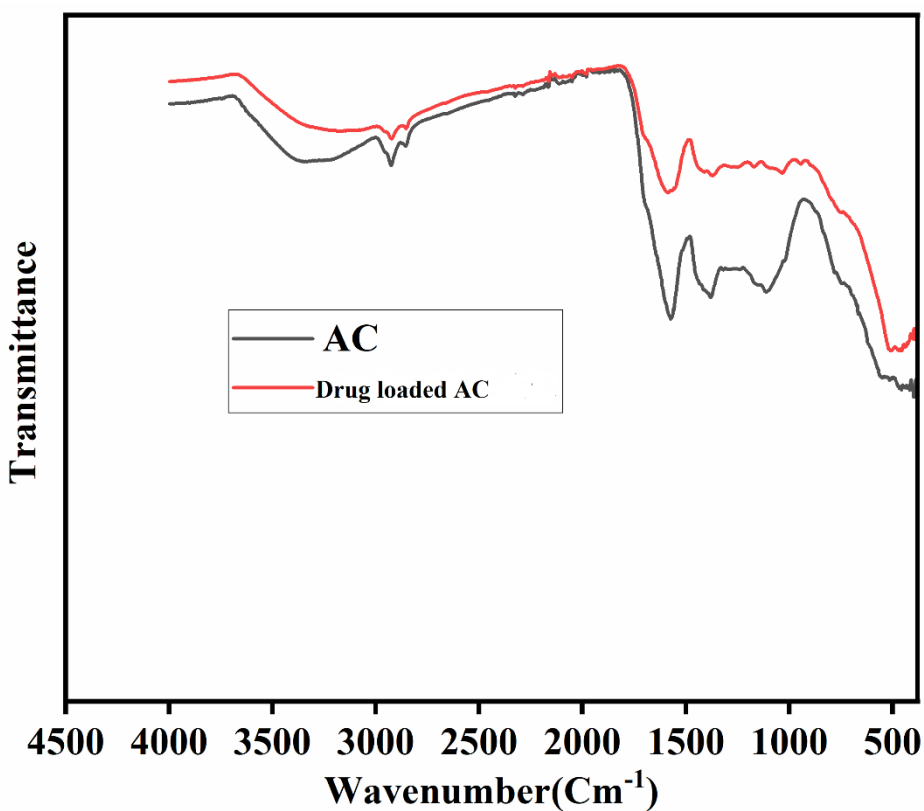

**Fig S1 FT-IR spectra of AC before and after drug adsorption**

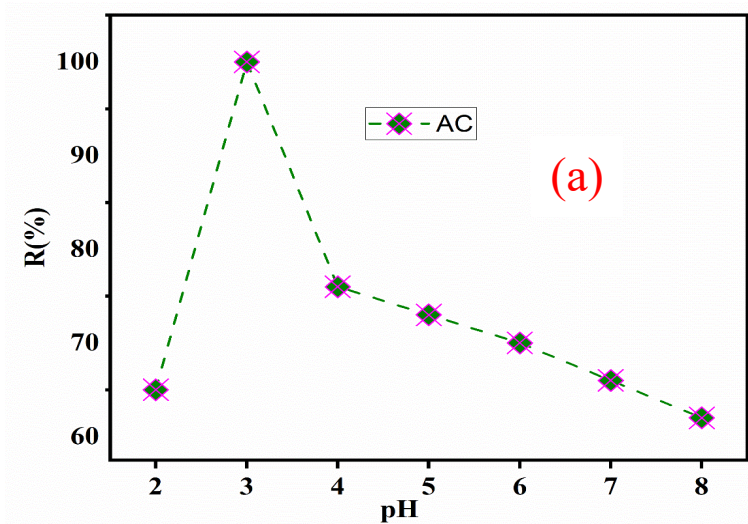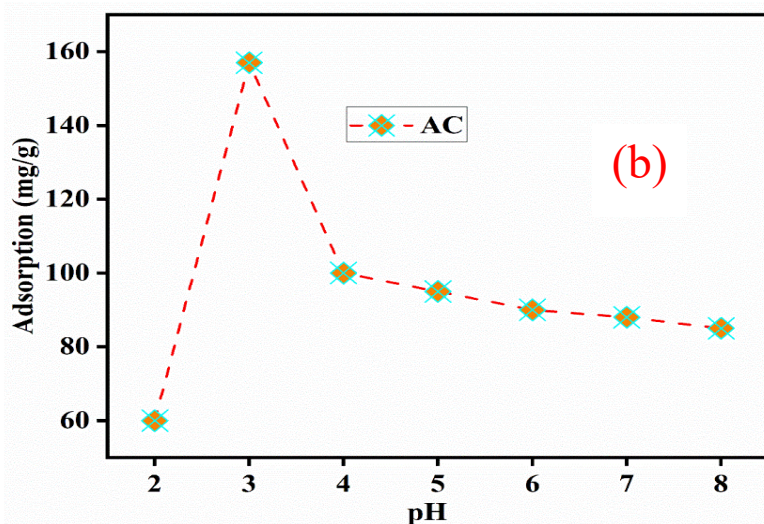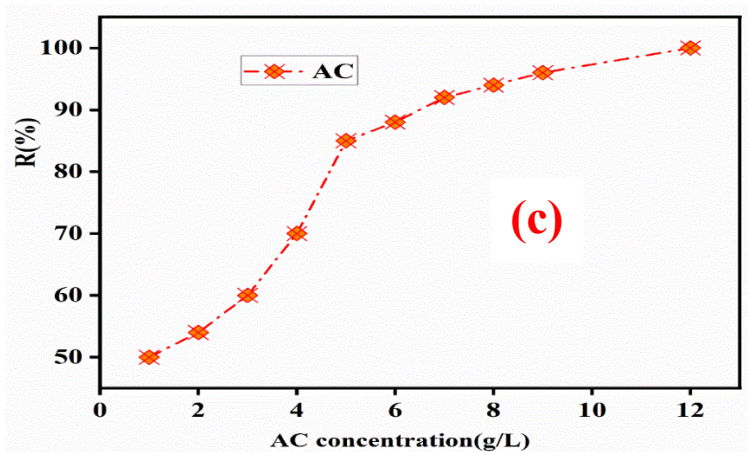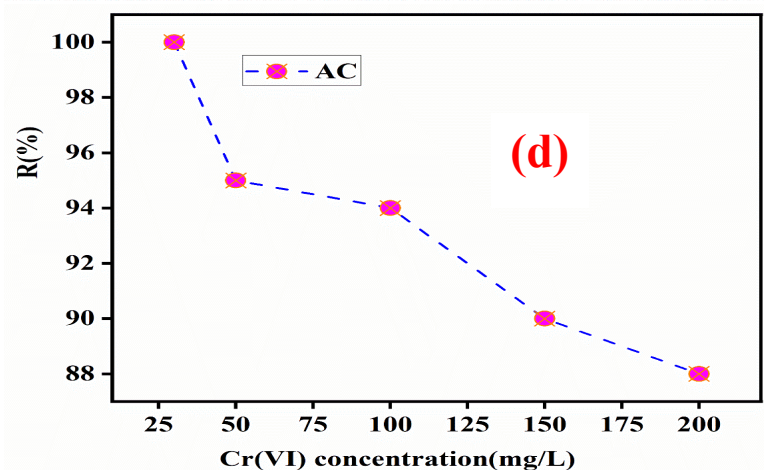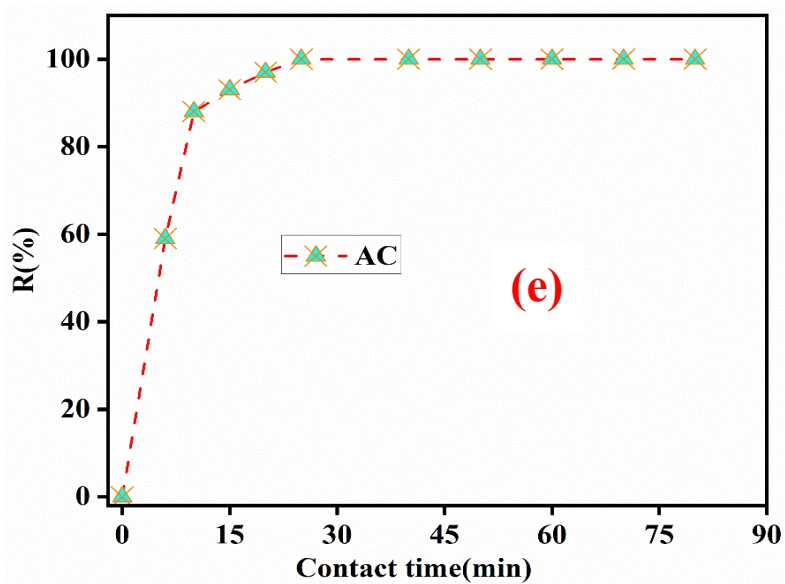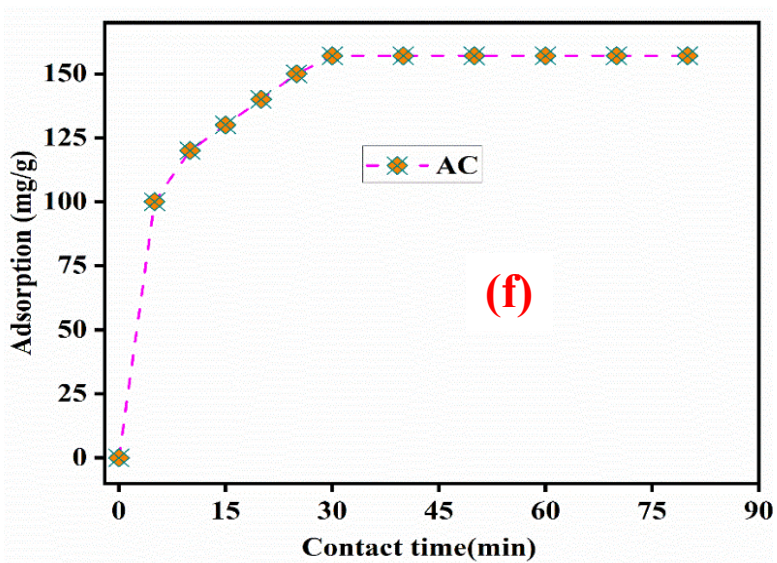

**Fig S2** effect of pH on removal percentage (a) adsorption capacity (b); effect of dosage on removal percentage (c); effect of Cr (VI) concentration on removal percentage (d); effect of contact time on removal percentage (e) adsorption capacity

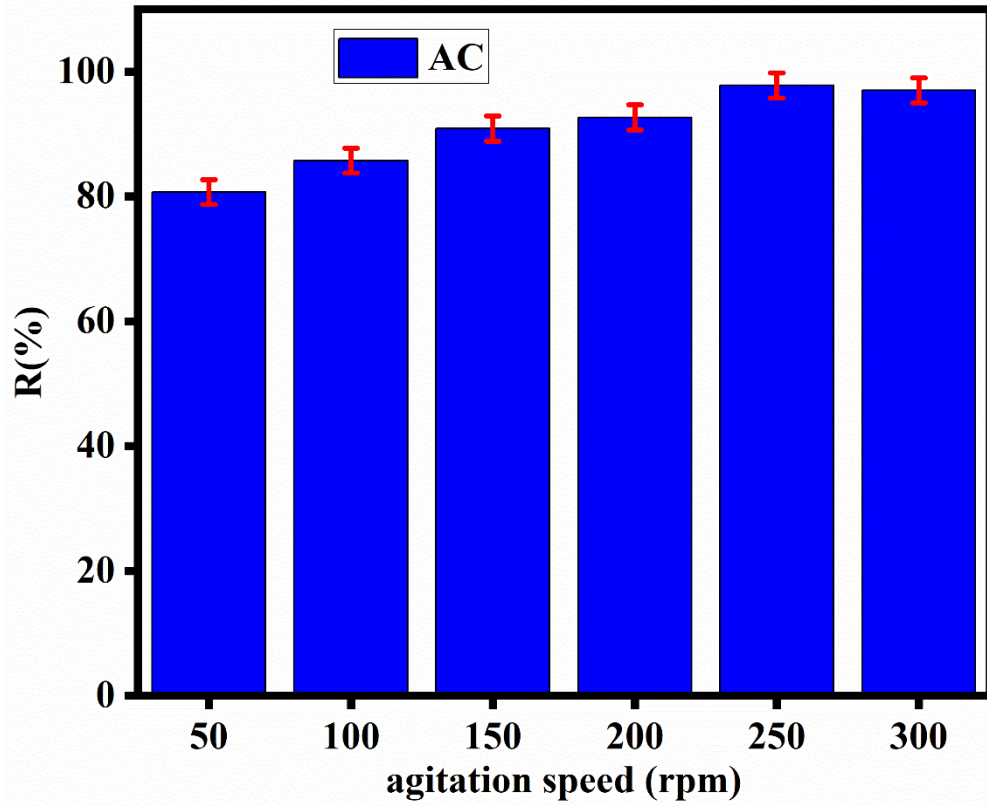

Fig S3 effect of agitation speed on removal percentage R(%)

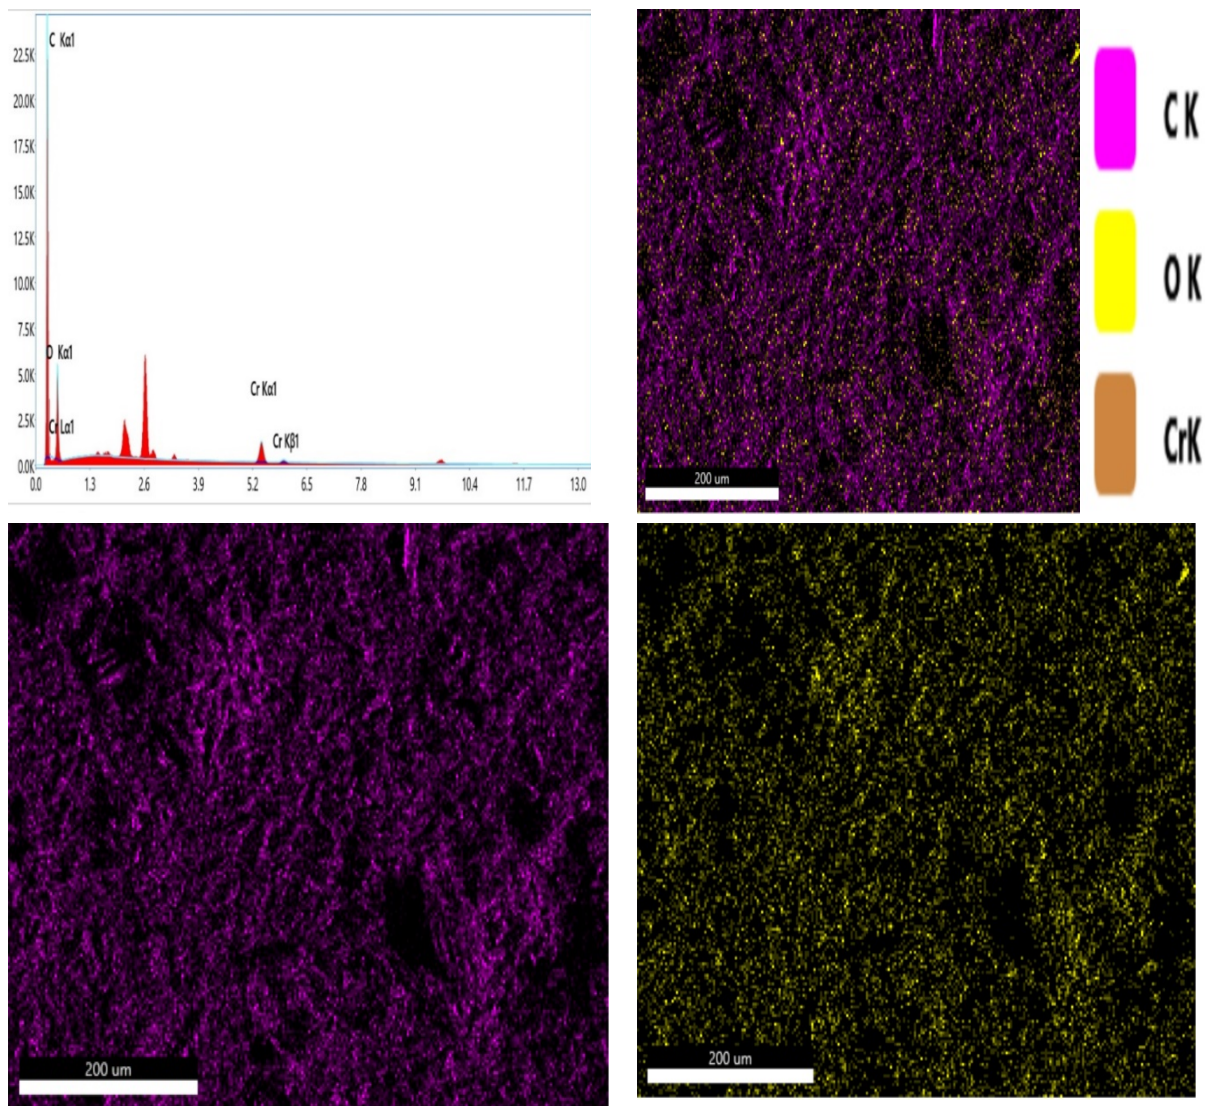

**Fig S4.** EDAX- mapping of AC after Cr (VI) adsorption

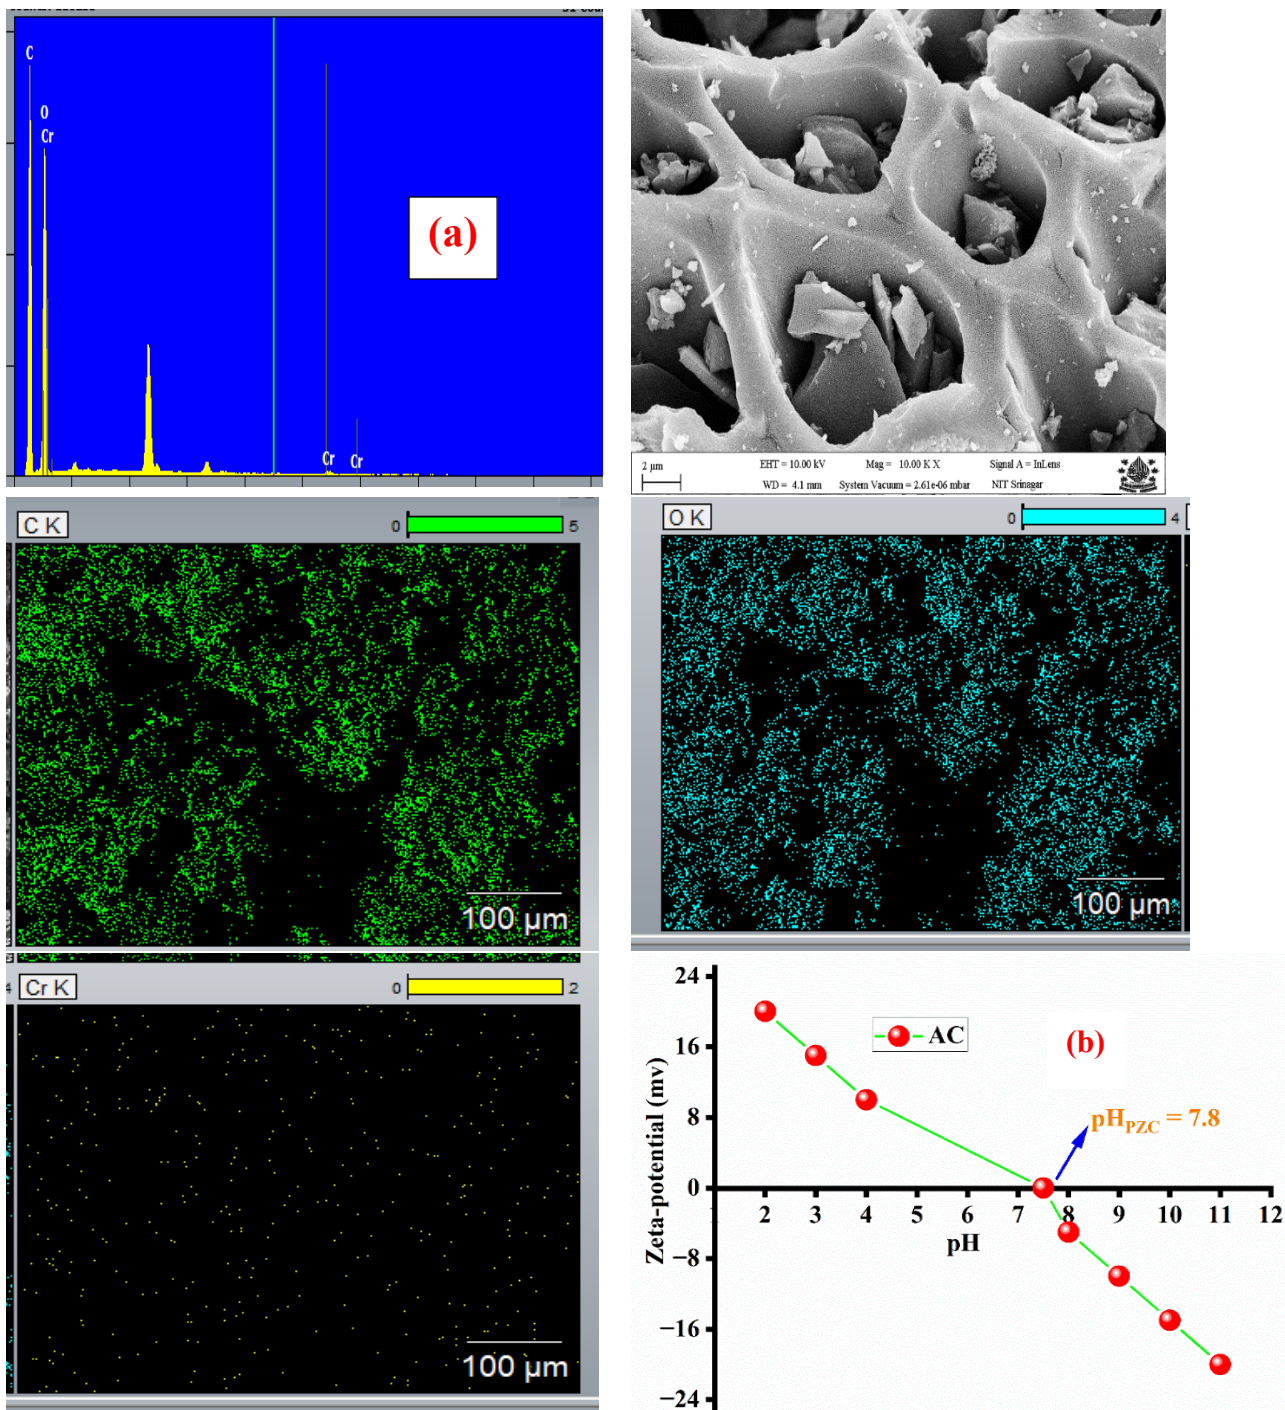

Fig.S5 (a) EDAX- mapping of CDPL after Cr (VI) adsorption; (b) point of zero charge analysis

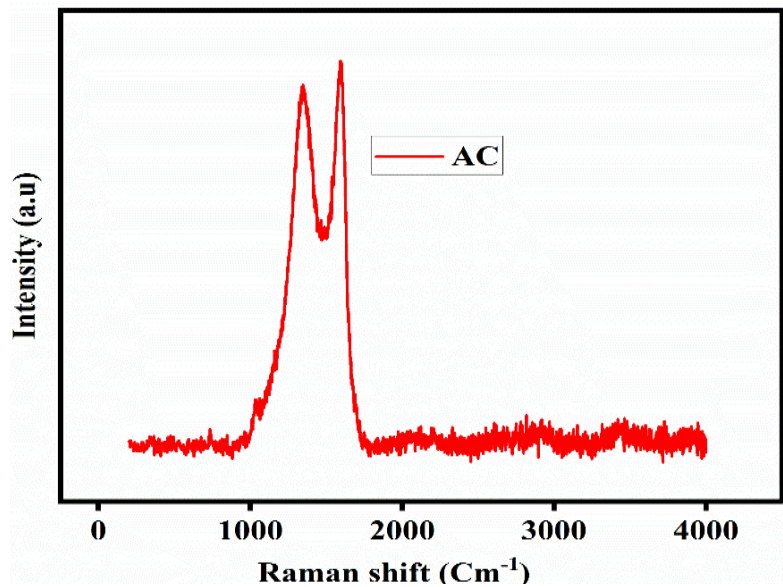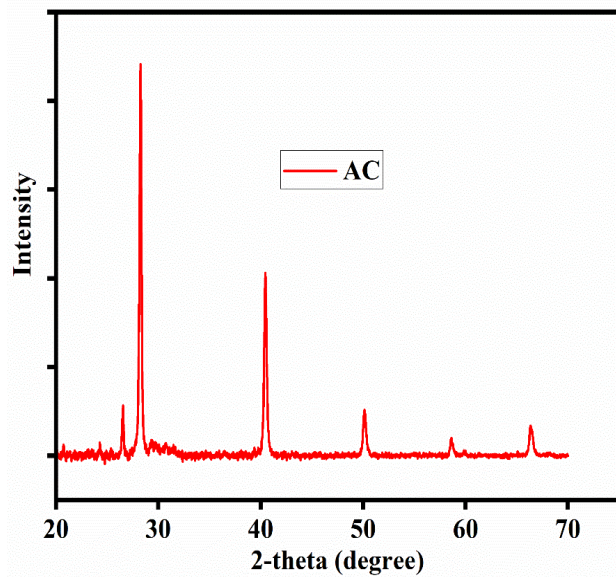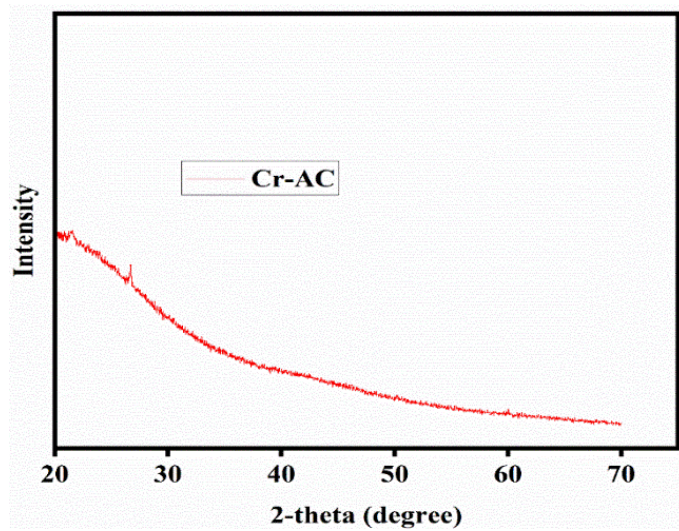

Fig.S6 Raman spectra of AC (a) XRD before (c) after (d) Cr (VI) adsorption

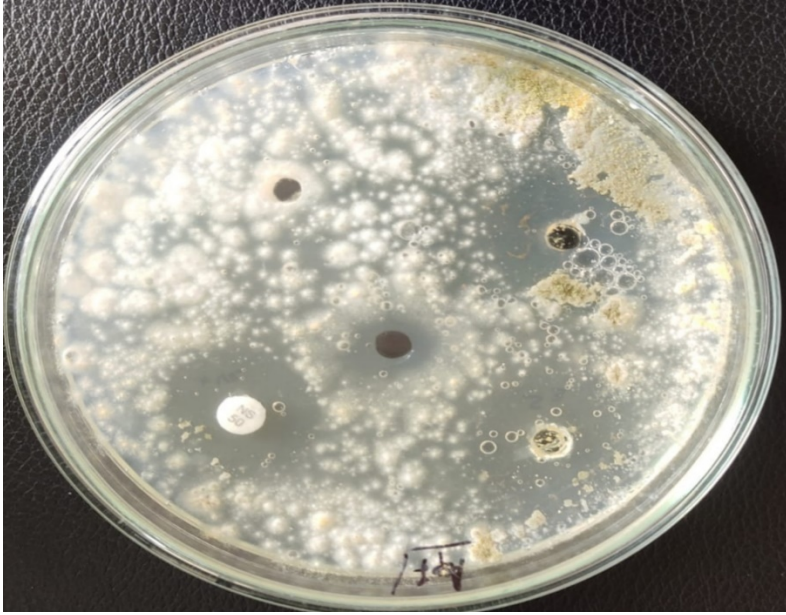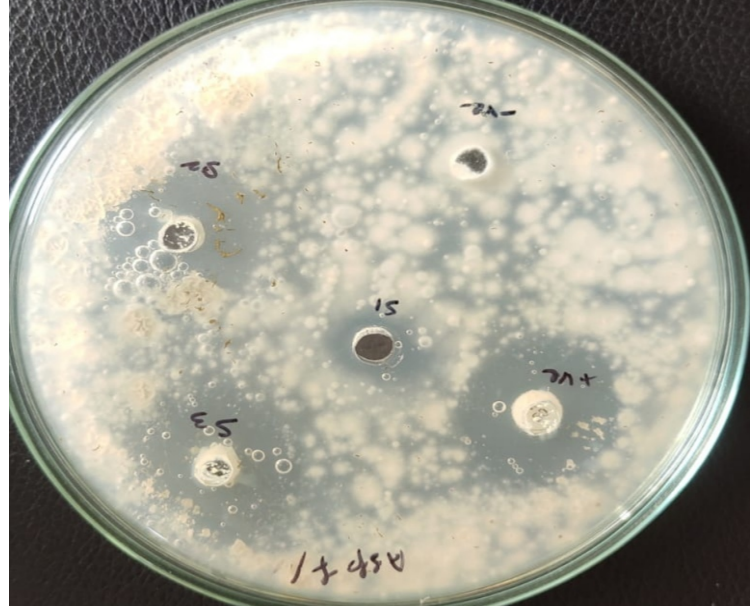

**Fig. S7** Antifungal activity of AC in combination with silver

**Table S1** Isothermal adsorption fitting curve data at different temperatures for Cr (VI), Acetaminophen, Ibuprofen, and Orudis KT adsorption onto AC

| Isotherm model  | Parameters                                       | Cr (VI)        | Acetaminophen     | Ibuprofen          | Orudis KT          |
|-----------------|--------------------------------------------------|----------------|-------------------|--------------------|--------------------|
| Langmuir        | Q <sub>max</sub> (mg/g)                          | 156.946±0.452  | 248.349 ± 8.23E-6 | 216.138 ± 7.415E-6 | 201.725 ± 7.739E-6 |
|                 | K <sub>L</sub> (L/mg)                            | 1.473±0.013    | 0.149 ± 2.65E-8   | 0.119 ± 1.93E-8    | 0.104 ± 1.750E-8   |
|                 | RMSE                                             | 0.107          | 1.05769E-10       | 6.9739E-11         | 6.59197E-11        |
|                 | R <sup>2</sup>                                   | 0.999          | 0.999             | 0.999              | 0.999              |
| Freundlich      | K <sub>F</sub> ((mg/g)/(L/mg) <sup>(1/n)</sup> ) | 89.181±2.142   | 94.497±7.027      | 69.923±5.774       | 58.62±5.117        |
|                 | 1/n                                              | 0.367±0.030    | 0.214±0.0201      | 0.247±0.222        | 0.269±0.0234       |
|                 | RMSE                                             | 26.557         | 57.508            | 46.787             | 41.526             |
|                 | R <sup>2</sup>                                   | 0.966          | 0.9437            | 0.9499             | 0.9537             |
| Temkin          | A (L/g)                                          | 13.775±0.910   | 3.806±1.047       | 2.037±0.415        | 1.477±0.247        |
|                 | B (j/mol)                                        | 35.086±0.770   | 41.714±2.358      | 40.020±1.923       | 39.314±1.694       |
|                 | RMSE                                             | 2.646          | 25.429            | 16.911             | 12.825             |
|                 | R <sup>2</sup>                                   | 0.998          | 0.994             | 0.995              | 0.995              |
| Radke Prausnitz | Q <sub>max</sub> (mg/g)                          | 190.115±52.325 | 217.378 ± 39.554  | 208.056 ± 42.039   | 156.858 ± 35.200   |
|                 | K <sub>RP</sub>                                  | 1.100±0.608    | 0.192 ± 0.069     | 0.129 ± 0.044      | 0.155 ± 0.062      |
|                 | n                                                | 1.540±0.215    | 0.972 ± 0.0416    | 0.994 ± 0.0461     | 0.944 ± 0.0505     |
|                 | RMSE                                             | 50.580         | 14.762            | 10.680             | 9.574              |
| Toth isotherm   | q <sub>m</sub> (mg/g)                            | 222.108±89.502 | 221.434 ± 35.763  | 209.363 ± 32.250   | 165.322 ± 32.191   |
|                 | K <sub>T</sub>                                   | 1.089±0.533    | 0.183 ± 0.055     | 0.127 ± 0.032      | 0.139 ± 0.044      |
|                 | t                                                | 1.153±0.2165   | 0.972 ± 0.0414    | 0.994 ± 0.045      | 0.944 ± 0.050      |
|                 | RMSE                                             | 50.580         | 14.762            | 10.680             | 9.574              |
|                 | R <sup>2</sup>                                   | 0.971          | 0.997             | 0.997              | 0.997              |

**Table S2** Calculated values of parameters for kinetic models of Cr (VI) onto AC

| Adsorbent | C <sub>o</sub> (mg/L) | Q <sub>e</sub> (exp)<br>(mg/g) | Pseudo-first-order                  |                             |                | Pseudo- second -order     |                             |                |
|-----------|-----------------------|--------------------------------|-------------------------------------|-----------------------------|----------------|---------------------------|-----------------------------|----------------|
|           |                       |                                | K <sub>1</sub> (min <sup>-1</sup> ) | Q <sub>e</sub> (cal) (mg/g) | R <sup>2</sup> | K <sub>2</sub> (g/mg min) | Q <sub>e</sub> (cal) (mg/g) | R <sup>2</sup> |
| AC        | 0.5                   | 29.98                          | 0.107                               | 16.53                       | 0.94           | 0.0435                    | 30.31                       | 0.999          |
|           | 1.0                   | 58.71                          | 0.17                                | 23.89                       | 0.96           | 0.0036                    | 60.62                       | 0.990          |
|           | 2.0                   | 118.39                         | 0.24                                | 36.31                       | 0.98           | 0.00073                   | 119.047                     | 0.994          |
|           | 3.0                   | 127.89                         | 0.028                               | 38.01                       | 0.94           | 0.0069                    | 129.87                      | 0.992          |
|           | 4.0                   | 144.69                         | 0.0197                              | 56.22                       | 0.77           | 0.00806                   | 146.19                      | 0.998          |



**Table S3** Calculated values of parameters for kinetic models of Acetaminophen, Ibuprofen, and Orudis KT on to AC

| Kinetic model        | Parameters                          | Acetaminophen     | Ibuprofen         | Orudis KT         |
|----------------------|-------------------------------------|-------------------|-------------------|-------------------|
| Pseudo-first-order   | Q <sub>e</sub> (mg/g)               | 91.716 ± 0.759    | 57.00 ± 0.054     | 47.230 ± 0.049    |
|                      | K <sub>1</sub> (min <sup>-1</sup> ) | 0.323 ± 0.026     | 0.24551 ± 0.002   | 0.190 ± 0.002     |
|                      | RMSE                                | 5.776             | 2.723             | 2.144             |
|                      | R <sup>2</sup>                      | 0.987             | 0.919             | 0.965             |
| Pseudo-second -order | Q <sub>e</sub> (mg/g)               | 94.948 ± 1.280E-6 | 58.928 ± 1.241E-6 | 49.189 ± 1.299E-6 |
|                      | K <sub>2</sub> (min <sup>-1</sup> ) | 0.008 ± 1.695E-9  | 0.007 ± 1.883E-9  | 0.005 ± 1.798E-9  |
|                      | RMSE                                | 9.157E-12         | 7.766E-12         | 7.858E-12         |
|                      | R <sup>2</sup>                      | 0.998             | 0.997             | 0.995             |

| Adsorbate     | ΔG <sup>0</sup> (kJ mol <sup>-1</sup> ) 298K ,312K,320K | ΔH <sup>0</sup> (kJmol <sup>-1</sup> ) | ΔS <sup>0</sup> (jmol <sup>-1</sup> ) |
|---------------|---------------------------------------------------------|----------------------------------------|---------------------------------------|
| Cr (VI)       | -0.003, -0.342, -1.03                                   | 72.853                                 | 21.021                                |
| Acetaminophen | -85.6, -86.4, -87.9                                     | -37.32                                 | 162.12                                |
| Ibuprofen     | -84.2, -84.9, -86.3                                     | -37.08                                 | 157.96                                |
| Orudis KT     | -81.8, -82.6, -84.1                                     | -33.50                                 | 161.01                                |

**Table.S4** Thermodynamic parameters of adsorption of Cr (VI), Acetaminophen, Ibuprofen, and Orudis KT by AC

| Contami                     |                                  |        |     |            |
|-----------------------------|----------------------------------|--------|-----|------------|
| Cr (VI)                     | Hexanediamide - modified biochar | 80.85  | 2.0 | 1          |
|                             | Melamine – modified biochar      | 62.26  | 2.0 | 1          |
|                             | L-glutathione modified biochar   | 55.66  | 2.0 | 1          |
|                             | AC                               | 156.9  | 3.0 | This study |
|                             | Natural peach gum polysaccharide | 188.32 | 2.0 | 26         |
| Acetaminophen (paracetamol) | AC derived from the oak acorn    | 45.45  | 3.0 | 3          |
|                             | NH <sub>4</sub> Cl -induced AC   | 233    | 7.1 | 4          |
|                             | Sludge-based activated carbon    | 145.4  | 8.0 | 5          |
|                             | AC                               | 248.16 | 8.0 | This study |
| Ibuprofen                   | AC from vegetable                | 115.1  | 2.0 | 6          |
|                             | AC from agricultural by product  | 12.6   | 4.1 | 7          |
|                             | AC from oak acorn                | 96.15  | 3.0 | 3          |
|                             | AC                               | 216.10 | 4.0 | This study |
| Orudis KT (Ketoprofen)      | AC from agricultural by-products | 24.7   | 4.0 | 7          |
|                             | AC from vegetable                | 79.1   | 2.0 | 6          |
|                             | graphene oxide/MOF composites    | 59     | 7.0 | 8          |
|                             | AC                               | 201.7  | 6.0 | This study |

**Table. S5** Adsorption capacities of various adsorbents reported in literature

| <b>Strains</b>                                                     | <b>AC with silver</b> | <b>Fluconazole</b> |
|--------------------------------------------------------------------|-----------------------|--------------------|
| <i>Aspergillus Niger</i>                                           | >512                  | 1.25               |
| <i>Asp</i>                                                         | ---                   | ---                |
| <b>Table .S6 Outcomes of antifungal activity by AC with silver</b> |                       |                    |
| <i>Ca.....</i>                                                     | ---                   | ---                |
| <i>Candida par psilosis</i>                                        | > 200                 | 2.5                |
| <i>Candida glabrata</i>                                            | >512                  | 2.5                |
