# Supplementary figures and images for: Remediation of hexavalent chromium and pharmaceuticals from aquatic environments by employing an oxygen-doped porous carbon adsorbent and its antifungal activity
Source: Royal Society of Chemistry journal article supplement (doi:10.1039/d2nj05841c), 2023-01-01

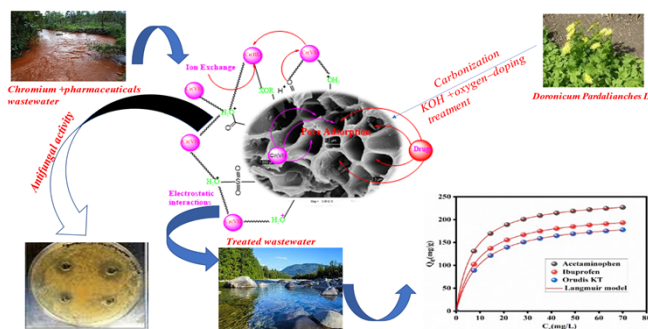

Supplement: d2nj05841c2.pdf [file d2nj05841c2.pdf]
